# Supplementary material for: Patient-reported outcomes and health-related quality of life for cetuximab versus bevacizumab in metastatic colorectal cancer: a prospective cohort study
Source: Springer Nature journal article supplement (doi:10.1007/s00432-019-02924-0), 2019-04-29
Supplement: MOESM1 [file 16684598]

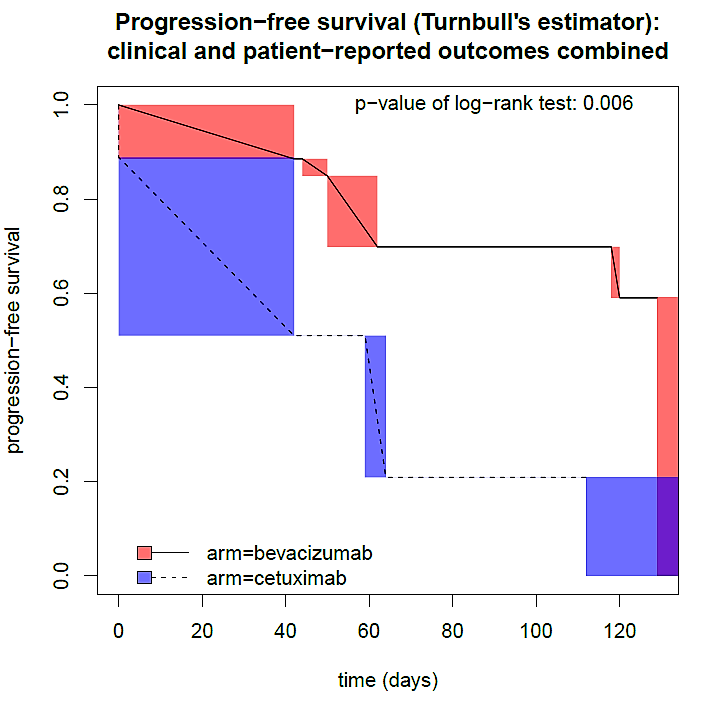


Supplement 1 – BRAF wild-type sensitivity analysis


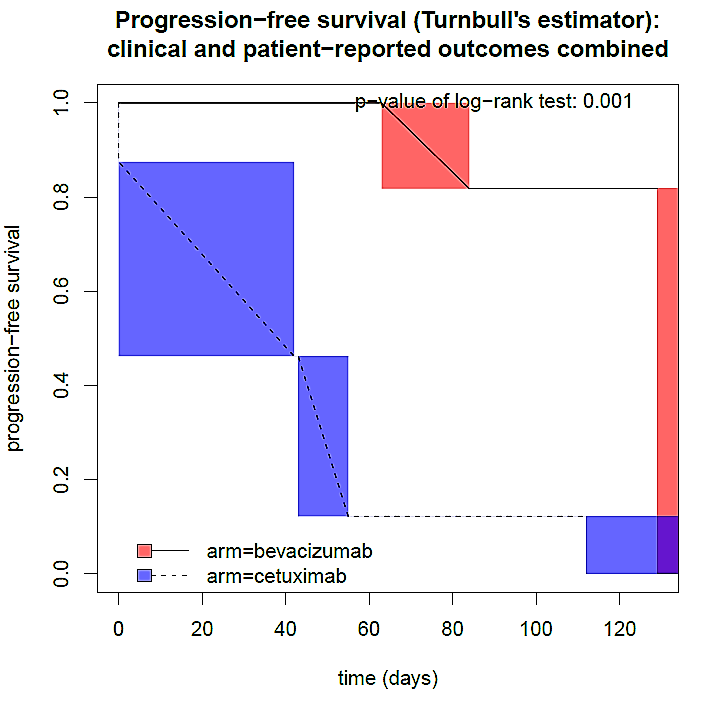


Supplement 2 - FOLFIRI backbone chemotherapy sensitivity analysis


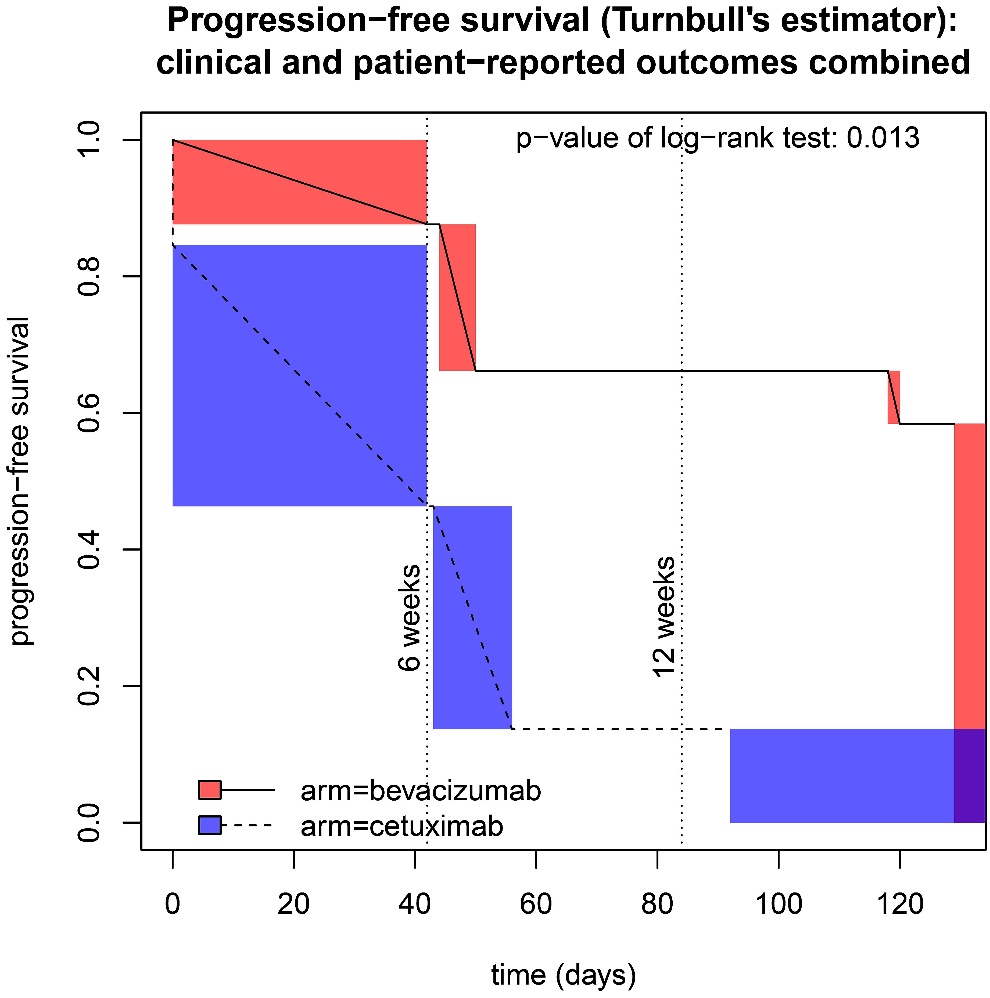


Supplement 3 – Left sided primary tumours sensitivity analysis
